# Supplementary material
Source: publisher figshare collection journal article supplement (https://acs.figshare.com/ndownloader/files/34786111)
Supplement: Supplementary file 1 [file 34786111]

## Supporting Information

# Remarkable thermoelectric performance in $K_2CdPb$ crystal with 1D building blocks via structure particularity and bond heterogeneity

Jie Zhang<sup>1</sup>, Dan He<sup>1</sup>, Hailong Jiang<sup>1</sup>, Xiaohong Xia<sup>1,\*</sup>, Yun Gao<sup>1,\*</sup>,  
Zhongbing Huang<sup>2,\*</sup>

<sup>1</sup> *School of Materials Science and Engineering, Hubei University, Wuhan  
430062, China*

<sup>2</sup> *School of Physics and Electronic Technology, Hubei University, Wuhan  
430062, China*

## Corresponding Author

\* E-mail: Xiaohong Xia (xhxia@hubu.edu.cn); Yun Gao (gaoyun@hubu.edu.cn);

Zhongbing Huang (huangzb@hubu.edu.cn).

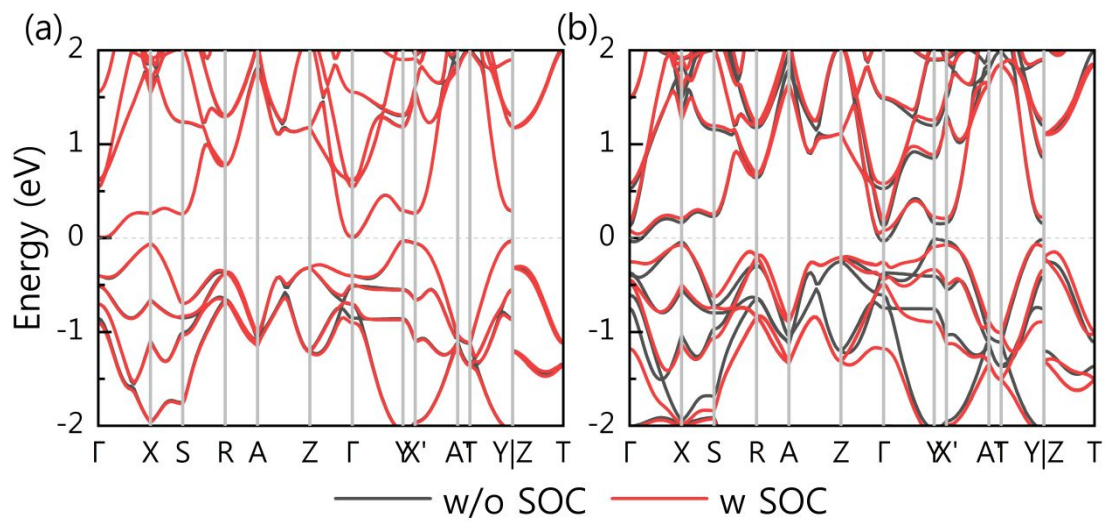

**Figure S1** Comparison of band structure calculated with (red line) and without (black line) spin-orbit coupling (SOC) effect for (a)  $K_2CdSn$  and (b)  $K_2CdPb$ .

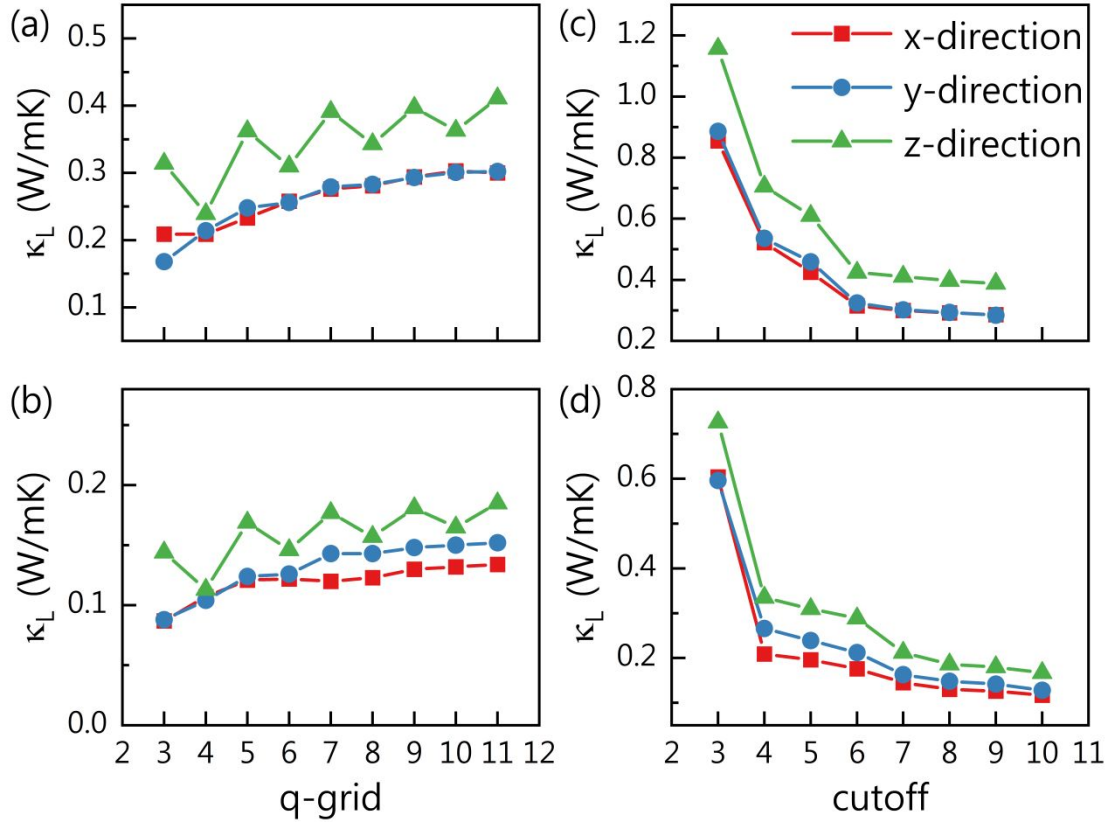

**Figure S2** Convergence test of the lattice thermal conductivity ( $\kappa_L$ ) with respect to (a) (b) q-mesh and (c) (d) interaction cutoff for  $K_2CdSn$  (upper panel) and  $K_2CdPb$  (lower panel), respectively. The red, blue and green lines indicate the  $\kappa_L$  along the x-, y- and z-direction, respectively.

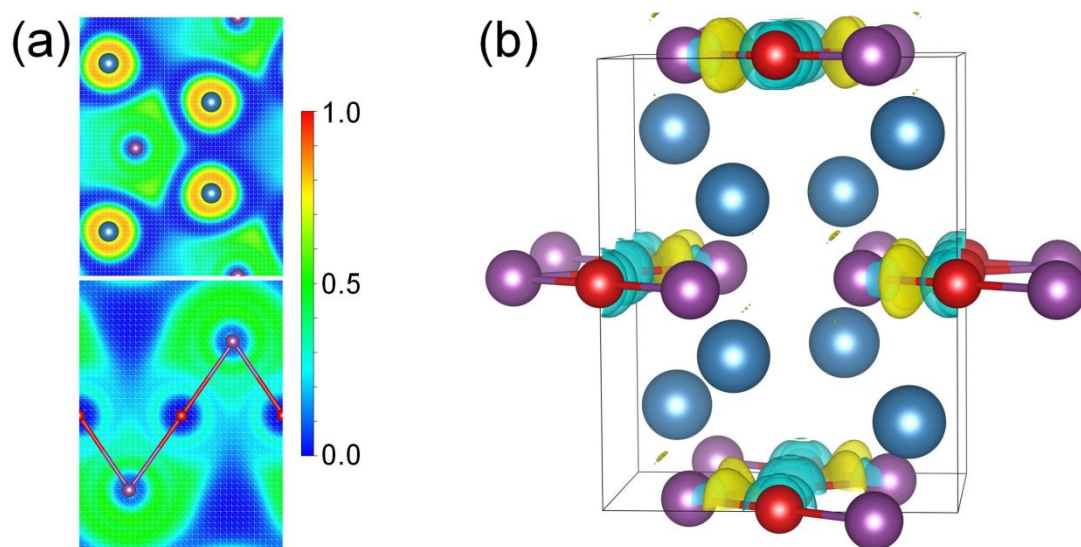

**Figure S3** (a) The electron localization function (ELF) in the (100) plane (upper) and (001) plane (lower), and (b) charge density difference of  $K_2CdPb$ . The blue, red and purple balls represent K, Cd and Pb atoms, respectively. The accumulative (depleted) electrons are represented by yellow (blue) iso-surfaces.

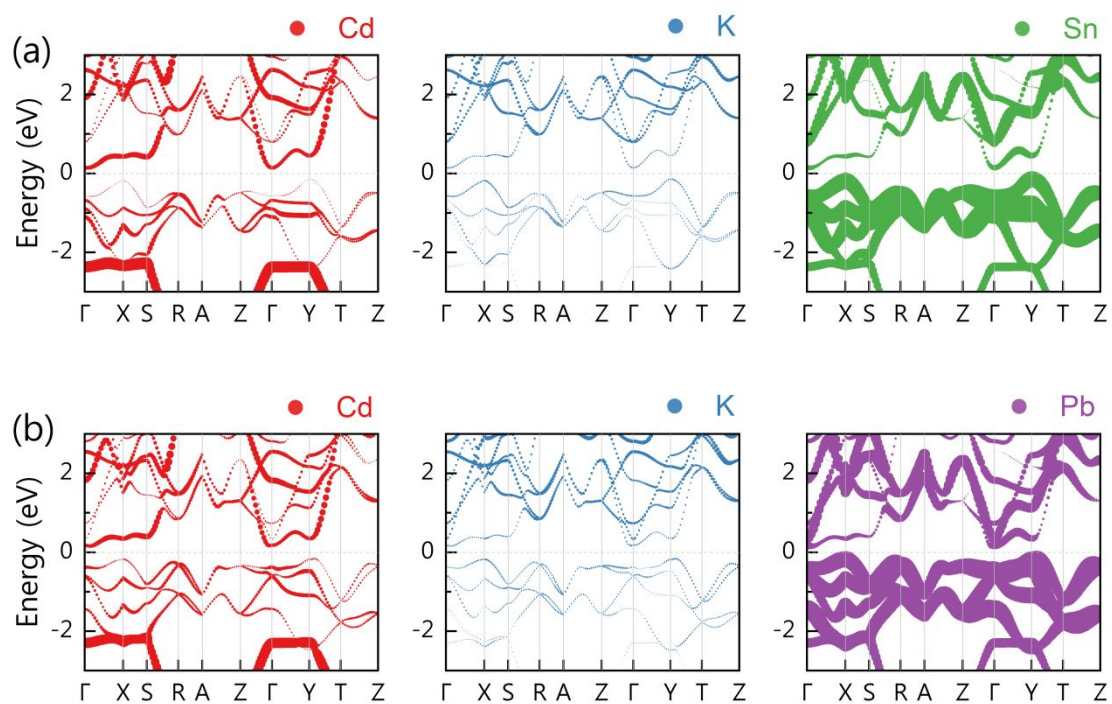

**Figure S4** The decomposed band structure of (a)  $K_2CdSn$  and (b)  $K_2CdPb$ . The red, blue, green and purple circles denote the projected band structure of Cd, K, Sn and Pb element, respectively.

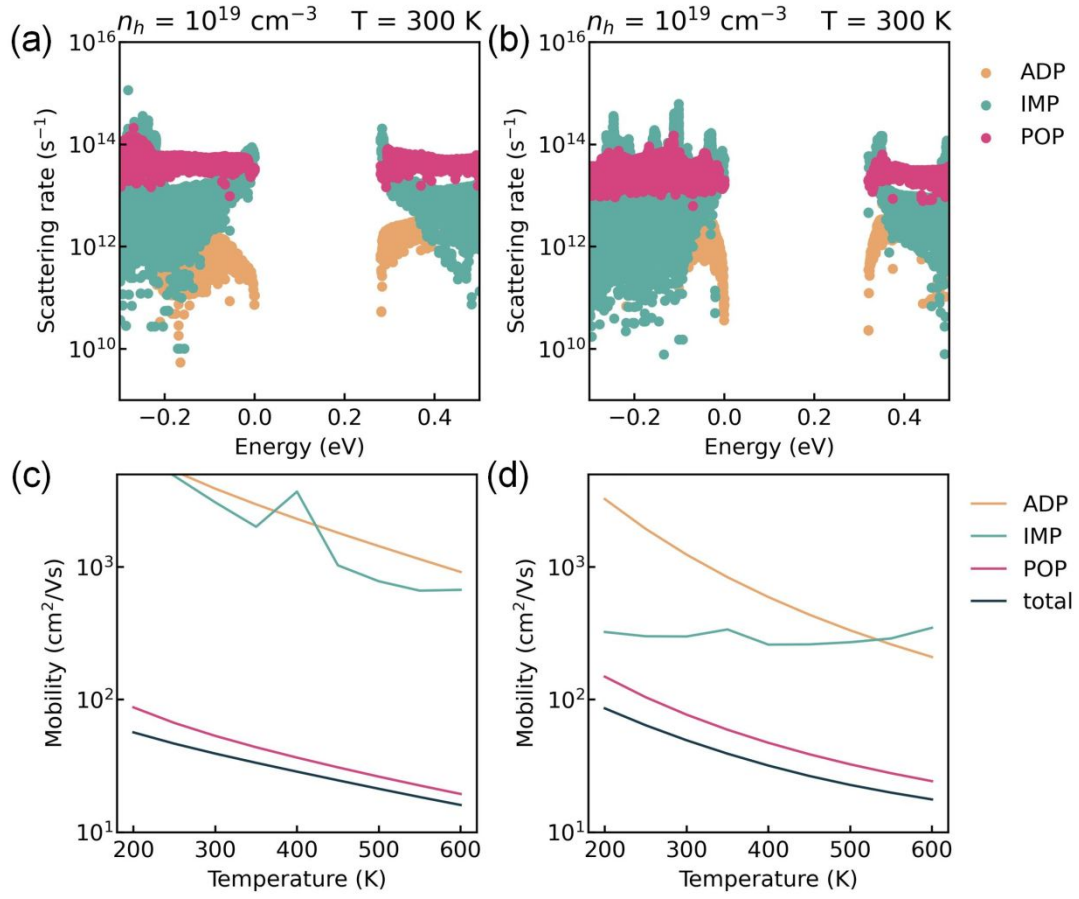

**Figure S5** (a) (b) Calculated room temperature scattering rates and (c) (d) variation of mobility with temperature at the hole concentration of  $10^{19} \text{ cm}^{-3}$  for  $K_2CdSn$  (left panel) and  $K_2CdPb$  (right panel) limited by acoustic deformation potential (ADP, orange circle or line), ionized impurity (IMP, cyan circle or line) and polar optical phonon (POP, magenta circle or line) scattering processes. The black line indicates the mobility obtained by considering the three scattering mechanisms.

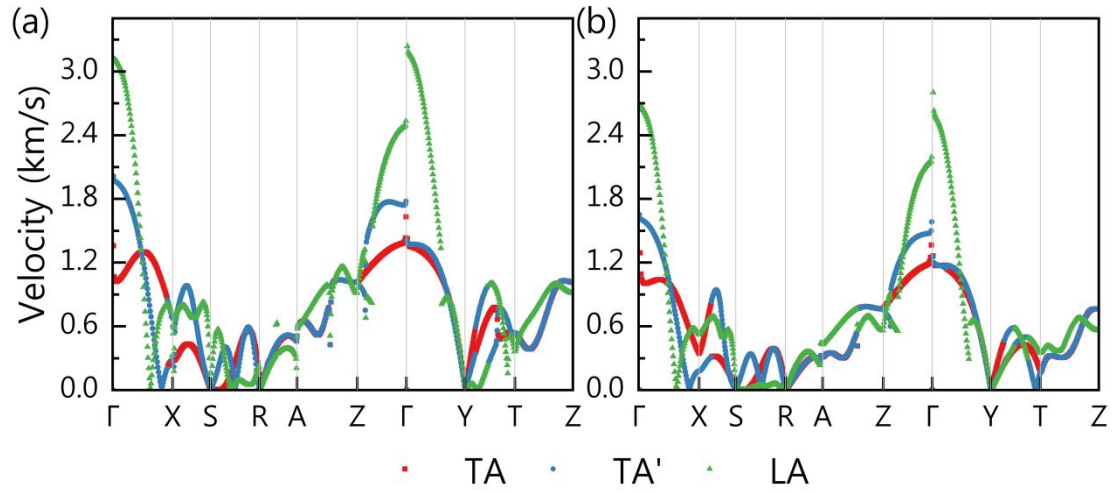

**Figure S6** Phonon group velocity (transverse acoustic (TA, TA') and longitudinal acoustic (LA)) along the high symmetry path for (a)  $K_2CdSn$  and (b)  $K_2CdPb$ . The TA, TA' and LA are colored by red, blue and green, respectively.

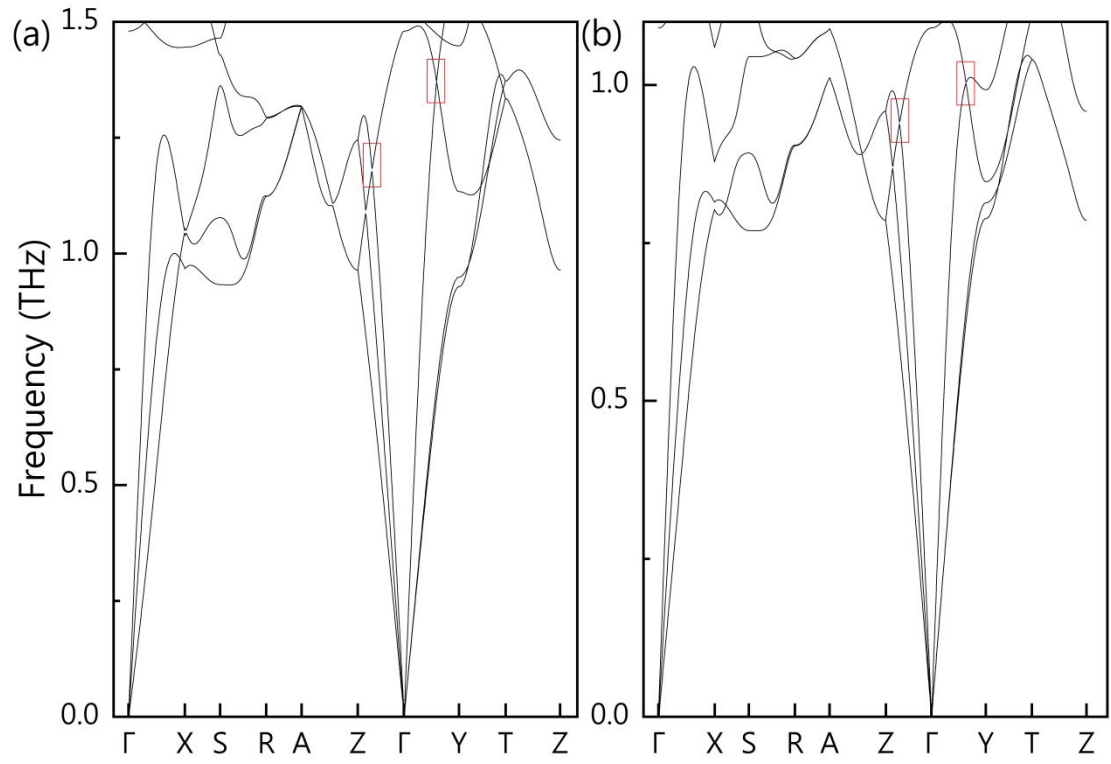

**Figure S7** Enlarged phonon spectrum of (a)  $K_2CdSn$  and (b)  $K_2CdPb$ , the regions marked by red rectangle denote the avoided crossing between the acoustic and optical modes.



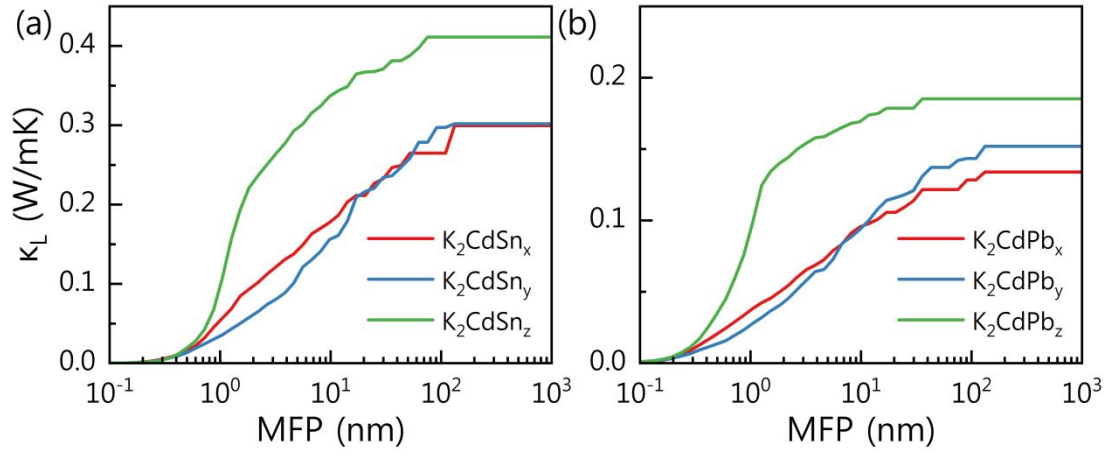

**Figure S8** Accumulative  $\kappa_L$  with respect to phonon mean free paths (MFP) along different directions for (a)  $K_2CdSn$  and (b)  $K_2CdPb$ .

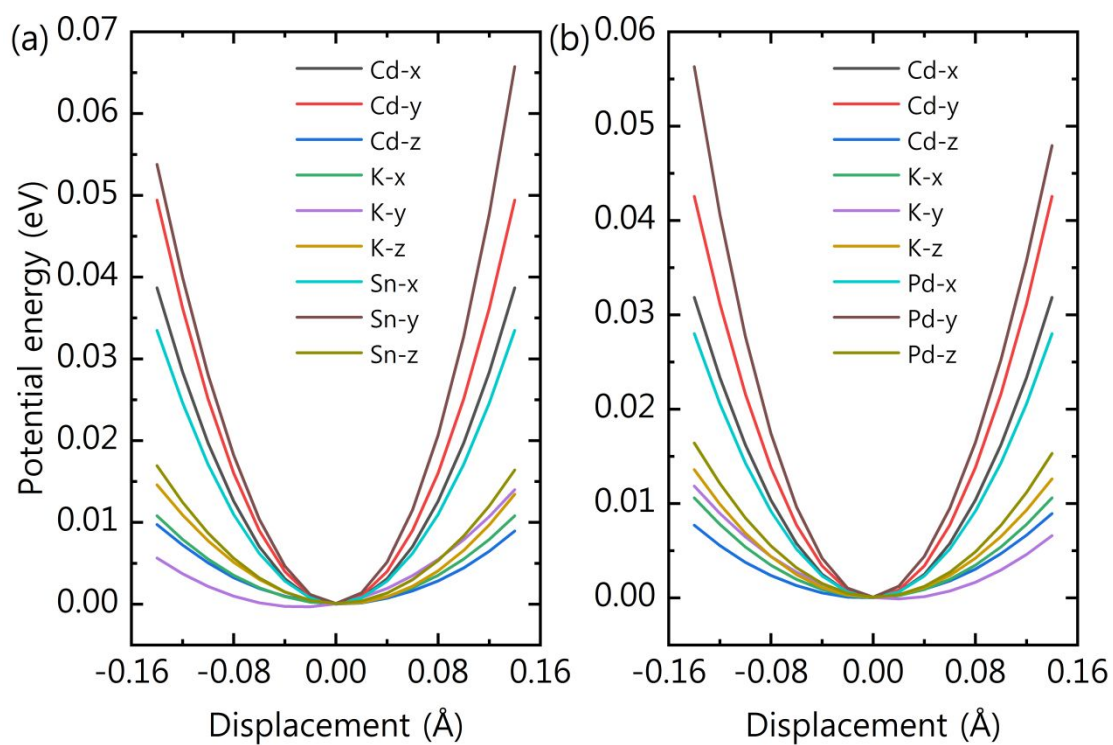

**Figure S9** Potential energy of atoms with displacement along x-, y- and z- directions for (a)  $K_2CdSn$  and (b)  $K_2CdPb$ .

**Table S1** The relevant parameters used to compute scattering rate.  $C$  (in GPa) is elastic tensor,  $\epsilon_s$  and  $\epsilon_\infty$  (in  $\epsilon_0$ ) are static and high-frequency dielectric constants, respectively.  $\omega_{PO}$  (in THz) is effective polar phonon frequency.

|                    | $C_{11}$ | $C_{22}$ | $C_{33}$ | $C_4$ | $C_{55}$ | $C_6$ | $C_1$ | $C_{13}$ | $C_2$ | $\epsilon_s^{11}$ | $\epsilon_s^{22}$ | $\epsilon_s^{33}$ | $\epsilon_\infty^{11}$ | $\epsilon_\infty^{22}$ | $\epsilon_\infty^{33}$ | $\omega_{PO}$ |
|--------------------|----------|----------|----------|-------|----------|-------|-------|----------|-------|-------------------|-------------------|-------------------|------------------------|------------------------|------------------------|---------------|
|                    |          |          |          | 4     |          | 6     | 2     |          | 3     |                   |                   |                   |                        |                        |                        |               |
| K <sub>2</sub> CdS | 30.      | 31.      | 22.      | 6.    | 14.      | 6.    | 5.    | 12.      | 5.    | 20.               | 15.               | 22.               | 14.                    | 12.                    | 15.                    | 2.8           |
| n                  | 7        | 8        | 3        | 4     | 7        | 3     | 9     | 7        | 1     | 6                 | 9                 | 5                 | 6                      | 7                      | 9                      | 4             |
| K <sub>2</sub> CdP | 28.      | 29.      | 20.      | 6.    | 12.      | 6.    | 5.    | 11.      | 4.    | 31.               | 22.               | 28.               | 21.                    | 19.                    | 21.                    | 2.6           |
| b                  | 7        | 3        | 1        | 2     | 9        | 0     | 7     | 6        | 7     | 5                 | 6                 | 3                 | 7                      | 6                      | 5                      | 6             |
